# Supplementary material for: Absorption and Biotransformation of Selenomethionine and Selenomethionine-oxide by Wheat Seedlings (<em>Triticum aestivum </em>L.)
Source: Preprints.org preprint supplement (doi:10.20944/preprints202312.0376.v1), 2023-12-06
Supplement: Supplementary file 3 [file supplementary]

**Absorption and biotransformation of selenomethionine and selenomethionine-oxide by wheat seedlings (*Triticum aestivum* L.)**

**Qi Wang, Siyu Huang, Qingqing Huang, Yao Yu, Huafen Li, Yanan Wan***


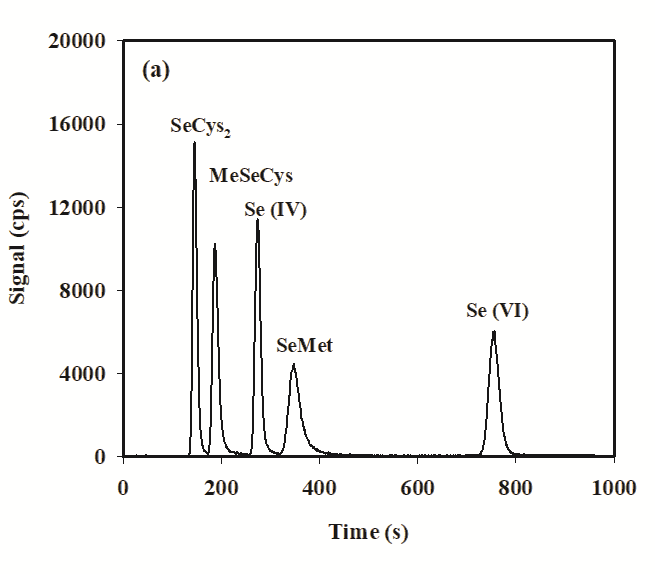

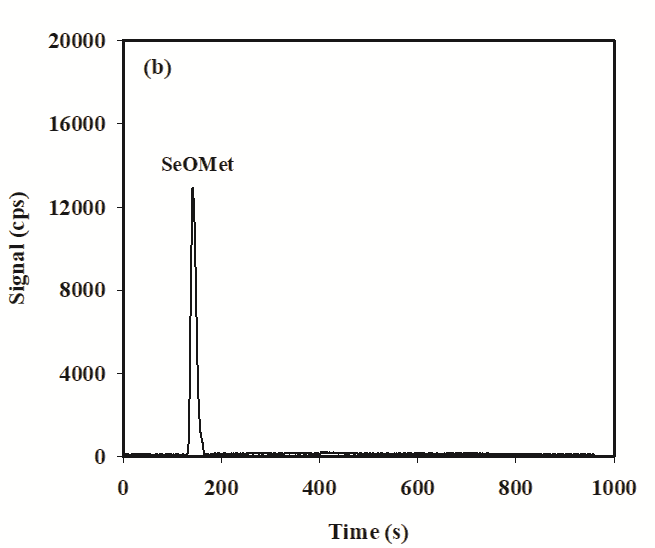


**Figure S1.** Analytical HPLC-ICP-MS chromatogram of six standard Se species (100 µg L-1): (a) SeCys2, MeSeCys, Se (IV), SeMet and Se (VI); (b) SeOMet.
